# Supplementary material for: MEK-ERK pathway modulation ameliorates disease phenotypes in a mouse model of Noonan syndrome associated with the Raf1L613V mutation
Source: JCI journal article supplement (doi:10.1172/jci44929), 2011-02-21
Supplement: sd1 [file 1]

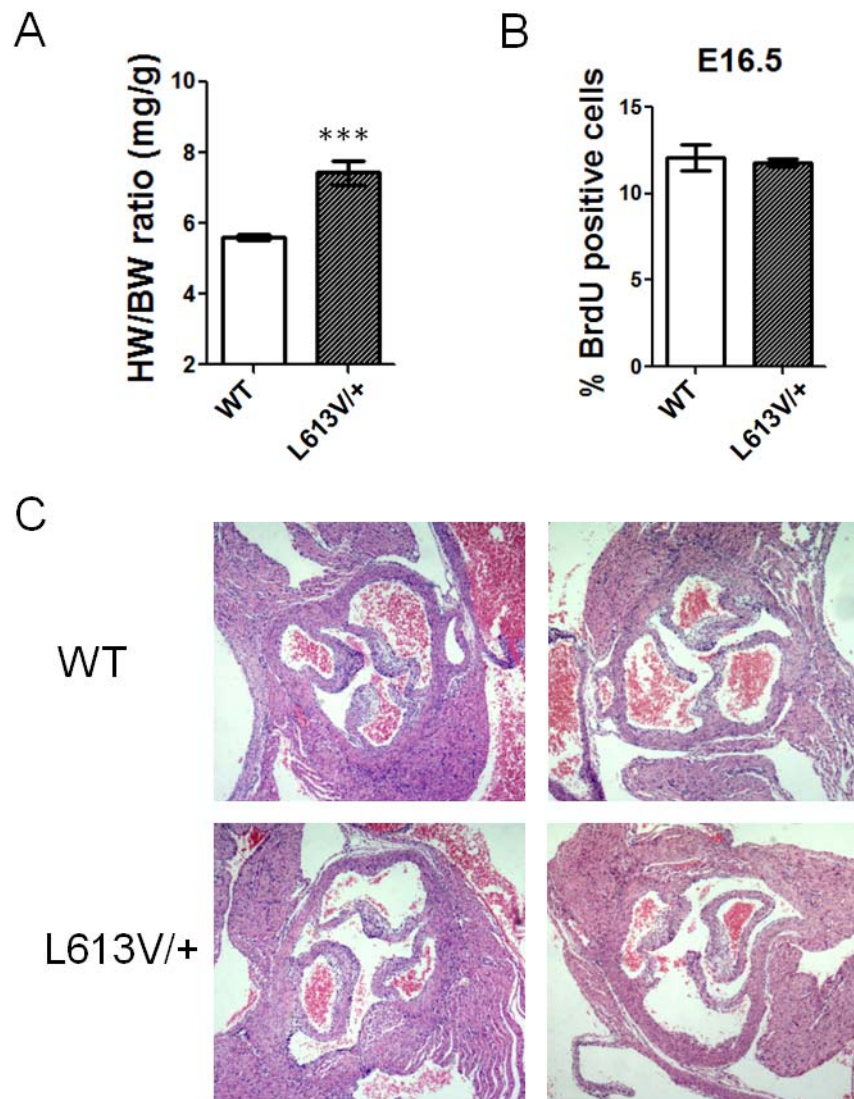

**Supplemental Figure 1. Normal cardiomyocyte proliferation and valve development in L613V/+ mice.** (A) L613V/+ mice show cardiac hypertrophy, as indicated by heart weight/body weight ratio (mg/g) as early as 2 weeks after birth (n=14 for each genotype). \*\*\* p<0.0001, 2-tailed Student's t-test. (B) No difference in BrdU incorporation in E16.5 WT (n=4) and L613V/+ (n=3) hearts. (C) Representative H&E-stained cross-sections of aortic valves in 1 week-old mice (original magnification, 40X; two individual samples are shown for each genotype). No obvious abnormalities were noted in other cardiac valves either.

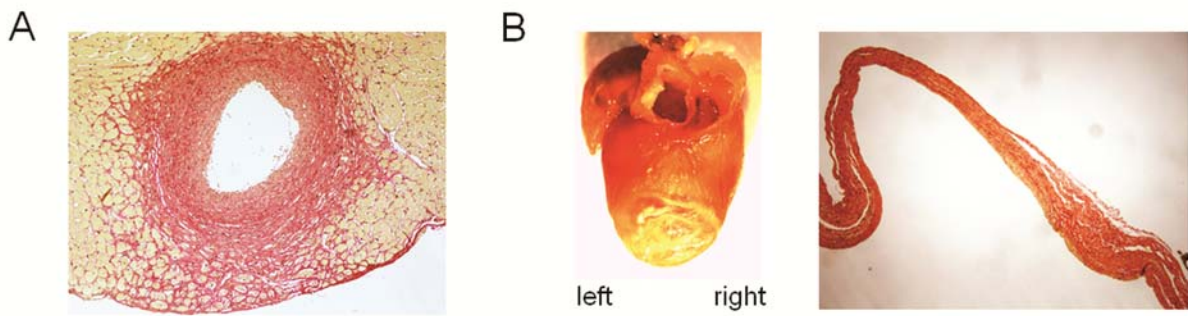

**Supplemental Figure 2. Severe perivascular fibrosis and infarct in L613V/+ mice after TAC** (A) Severe perivascular fibrosis in L613V/+ heart after TAC (PSR staining; original magnification, 200X). (B) Gross appearance of an LV/+ heart (left) with a severe infarct after TAC, and severe fibrosis (right) in the infarcted region (PSR staining; original magnification, 100X).

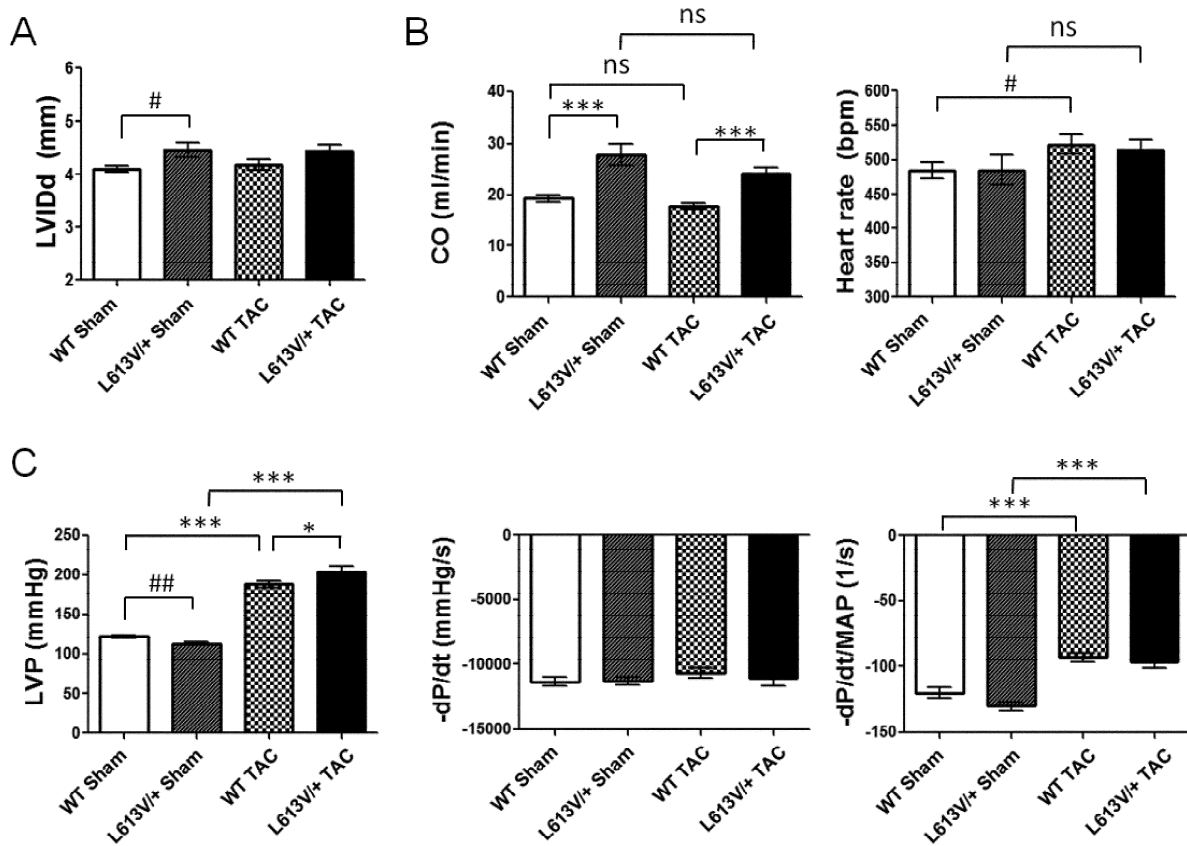

**Supplemental Figure 3. Hypertrophic response after TAC** (A, B) Additional echocardiographic parameters of hearts after TAC. LVIDd, left ventricular internal end-diastolic dimension; CO, cardiac output. (C) Additional invasive hemodynamic parameters of hearts after TAC. LVP, left ventricular systolic pressure; MAP, mean arterial pressure. \*  $p < 0.05$ ; \*\*\*  $p < 0.0001$  (Bonferroni post-test when ANOVA is significant); #  $p < 0.05$ ; ##  $p < 0.005$  (1-tailed Student's t-test); ns=not significant.

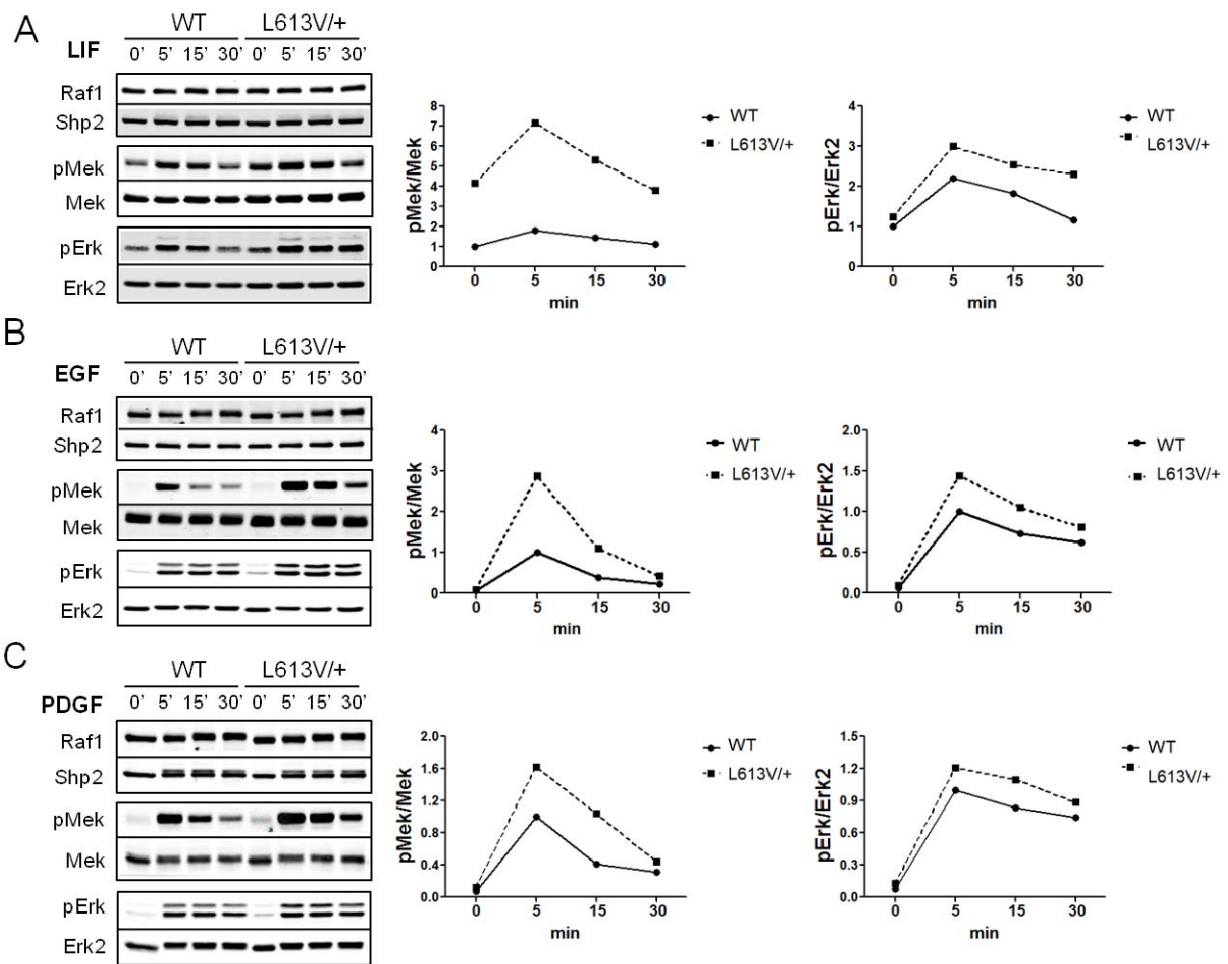

**Supplemental Figure 4. Raf1<sup>L613V</sup> mutant causes increased Mek and Erk activation in multiple cell types.** (A) WT and L613V/+ ES cells were removed from feeders, starved for 6 hr, and then stimulated with LIF (10<sup>3</sup>U/ml) or left unstimulated (0'). Cell lysates (20μg protein) were resolved by SDS-PAGE, and analyzed by immunoblotting with the indicated antibodies. One of two experiments with comparable results is shown. (B, C) Primary mouse embryo fibroblasts (MEFs) from WT and L613V/+ mice were starved for 16 hr, and then either stimulated with 10 ng/ml EGF (n=4; two independent experiments in two different MEF strains) or 50 ng/ml PDGF (n=2; one experiment in each of two different MEF strains). Quantification of blots from all experiments is shown at right.

A

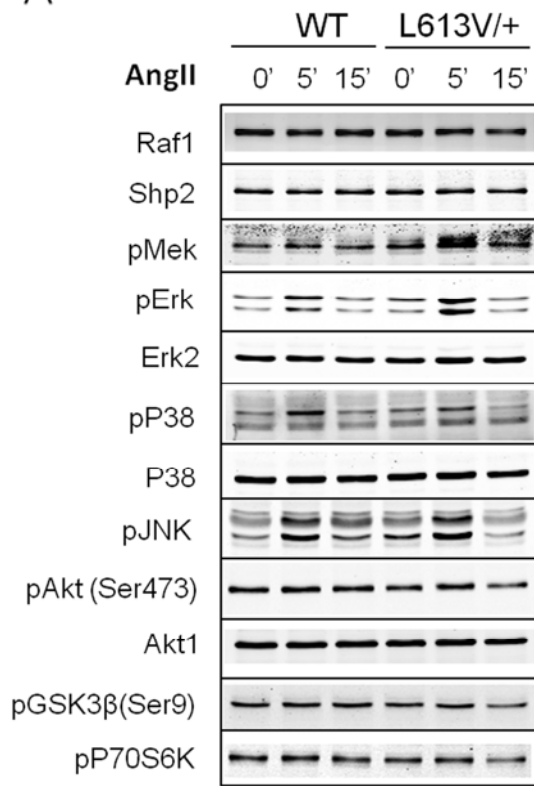

B

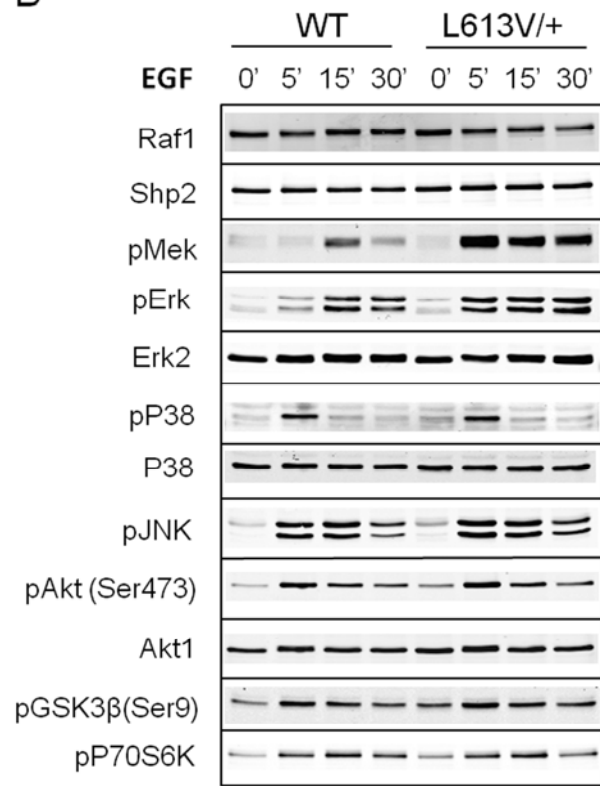

**Supplemental Figure 5. Other signaling pathways are unaffected in neonatal cardiac myocytes and fibroblasts.** (A) Cardiomyocytes from neonatal WT and L613V/+ mice were starved for 24 hr, and then either left unstimulated (0') or stimulated with AngII (1μg/ml). (B) Cardiac fibroblasts from neonatal WT and L613V/+ mice were starved for 16 hr, and then either left unstimulated (0') or stimulated with EGF (10ng/ml). Cell lysates (15-20μg protein) were analyzed by immunoblotting with the indicated phospho-specific antibodies for other pathways implicated in cardiac hypertrophy.

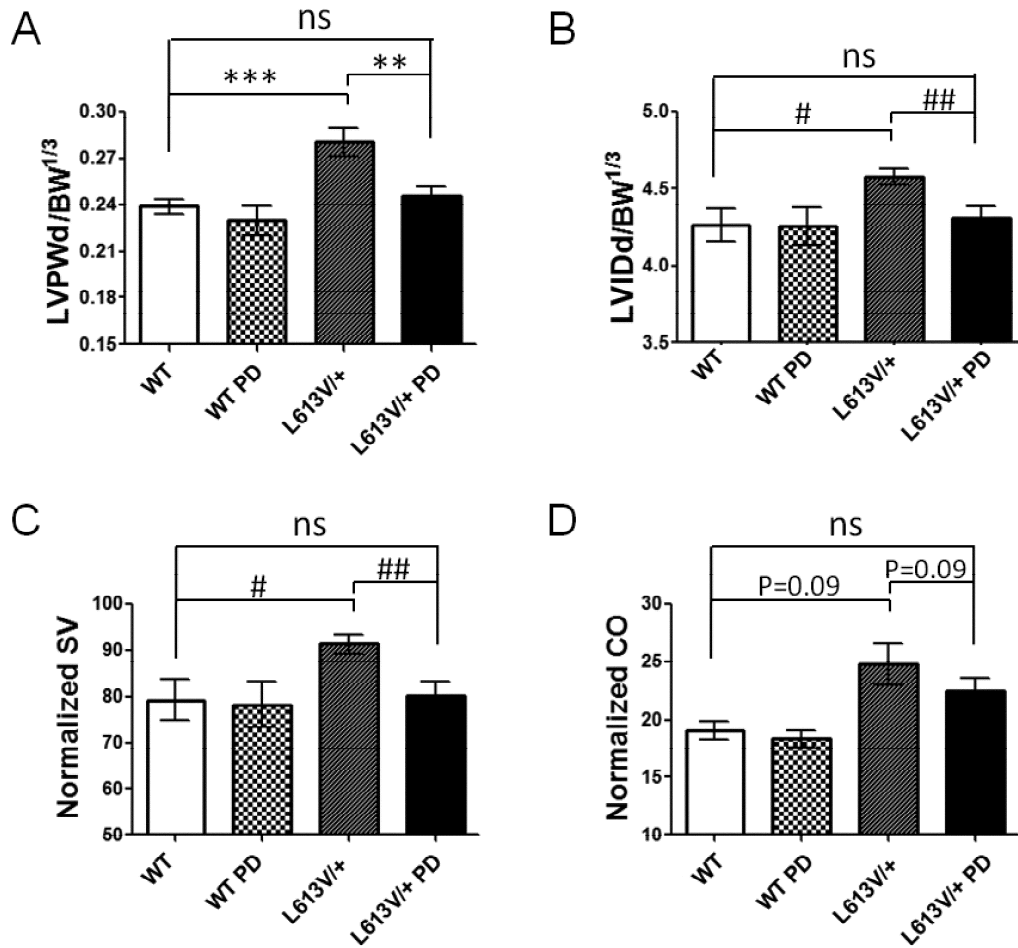

**Supplemental Figure 6. Normalized cardiac morphology and function after MEK inhibitor treatment.** (A) Left ventricular diastolic posterior wall thickness (LVPWd) normalized by  $BW^{1/3}$ . (B) Left ventricular internal end-diastolic dimension (LVIDd) normalized by  $BW^{1/3}$ . (C) Normalized stroke volume (SV). End-diastolic volume (EDV) =  $(4.5 \times \text{normalized LVIDd}^2)$ ; End-systolic volume (ESV) =  $(3.72 \times \text{normalized LVIDd}^2)$ ;  $SV = EDV - ESV$ . (D) Normalized cardiac output (CO).  $CO = \text{Normalized SV} \times \text{Heart rate}$ . \*\*  $p < 0.005$ ; \*\*\*  $p < 0.0001$  (Bonferroni post-test when ANOVA is significant); #  $p < 0.05$ ; ##  $p < 0.005$  (1-tailed Student's t-test); ns = not significant.  $n = 14$  for WT control;  $n = 10$  for LV/+ control;  $n = 6$  for WT treatment (WT PD);  $n = 14$  for L613V/+ treatment (L613V/+ PD).

|                                      |              |                                              |
|--------------------------------------|--------------|----------------------------------------------|
| PCR Screening                        | sense        | 5'-TCCAGCTAATTGACATTGCCCGACAGACAGCTCAG-3'    |
|                                      | antisense    | 5'-GAACGGGTTGTCATCCTGCATCCGGATTACTTCTG-3'    |
| Neo probe                            | sense        | 5'-GGA TTG CAC GCA GGT TCT CCG-3'            |
|                                      | antisense    | 5'-CGC CGC CAA GCT CTT CAG CAA-3'            |
| 5' probe                             | sense        | 5'-TGC TCT GGA GCT CAA ACC CTC AGT GTA G -3' |
|                                      | antisense    | 5'-CAT GGC TGA GTG GAC GGT CAG GCT G-3'      |
| 3' probe                             | sense        | 5'-GAG ACG GCA GAT CCT CAG TAG TAC TTG-3'    |
|                                      | antisense    | 5'-ACG GTG GTA GTT GTG TCT TTG GCC ATG-3'    |
| RT-PCR for Raf1 mRNA                 | sense        | 5'-TCT CCA TGA AGG CCT CAC GGTG-3'           |
|                                      | antisense    | 5'-AGA CTG GTA GCC TTG GGG ATG TAG-3'        |
| Genotyping for Raf1 <sup>L613V</sup> | sense        | 5'-ATC CCC TGA TCT CAG CAG GCT CTAC-3'       |
|                                      | antisense    | 5'-AGT AGT CTA GGT CCT TAG CAG CAGC-3'       |
| TaqMan probe<br>Cat. No              | <i>Myh6</i>  | Mm00440359_m1                                |
|                                      | <i>Myh7</i>  | Mm00600555_m1                                |
|                                      | <i>Nppa</i>  | Mm01255748_g1                                |
|                                      | <i>Nppb</i>  | Mm00435304_g1                                |
|                                      | <i>Gapdh</i> | 4352932E                                     |

**Supplemental Table 1. PCR primers.**
